# Supplementary material
Source: Springer Nature journal article supplement (https://www.springermedizin.de/resource/supplementary/12963_2010_133_MOESM3_ESM.pdf/9572732)

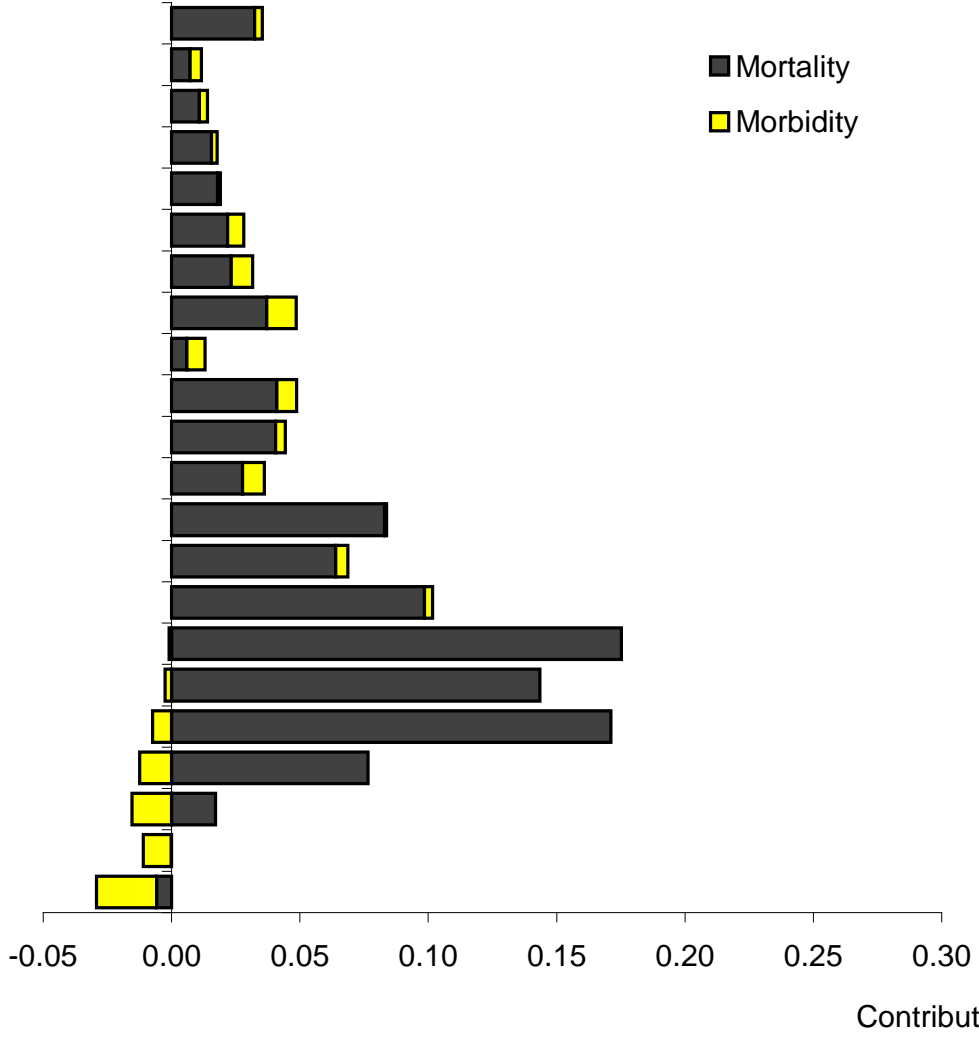

| Age                  | Percent change |           | Net   |
|----------------------|----------------|-----------|-------|
|                      | Mortality      | Morbidity |       |
| 0                    | 2.9            | 103.4     | 3.2   |
| 1-4                  | 0.6            | 154.3     | 1.0   |
| 5-9                  | 1.0            | 113.3     | 1.3   |
| 10-14                | 1.4            | 76.9      | 1.6   |
| 15-19                | 1.6            | 38.6      | 1.7   |
| 20-24                | 2.0            | 215.6     | 2.5   |
| 25-29                | 2.1            | 284.3     | 2.8   |
| 30-34                | 3.4            | 395.2     | 4.4   |
| 35-39                | 0.5            | 243.0     | 1.2   |
| 40-44                | 3.7            | 272.1     | 4.4   |
| 45-49                | 3.7            | 133.5     | 4.0   |
| 50-54                | 2.5            | 295.2     | 3.3   |
| 55-59                | 7.5            | 27.0      | 7.6   |
| 60-64                | 5.8            | 165.1     | 6.2   |
| 65-69                | 8.9            | 113.0     | 9.2   |
| 70-74                | 15.9           | -33.9     | 15.8  |
| 75-79                | 13.0           | -86.4     | 12.7  |
| 80-84                | 15.5           | -256.8    | 14.8  |
| 85-89                | 6.9            | -432.6    | 5.8   |
| 90-94                | 1.5            | -533.1    | 0.2   |
| 95-99                | 0.0            | -372.6    | -1.0  |
| 100+                 | -0.5           | -815.1    | -2.6  |
|                      | 100.0          | 100.0     | 100.0 |
| Contribution (years) | 1.10           | 0.00      | 1.11  |

Supplement: MOESM3 [file 9572732]
